# Supplementary material for: Partial restoration of normal intestinal microbiota in morbidly obese women six months after bariatric surgery
Source: PeerJ journal article supplement (doi:10.7717/peerj.10442), 2020-11-26
Supplement: Nuutila__2010_Flow_Diagram.doc [file Nuutila__2010_Flow_Diagram.doc]

**
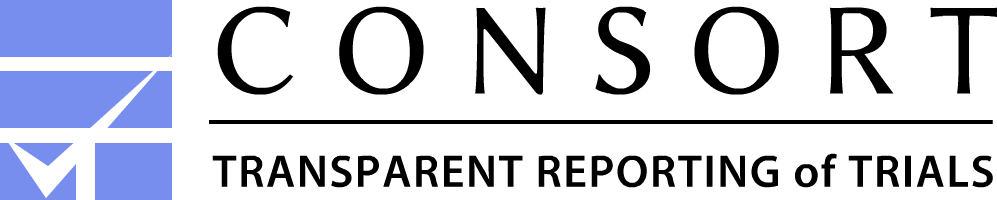
**

**CONSORT 2010 Flow Diagram**

**Analysis**

**Follow-Up**

**Enrollment**

Analysed (n=14 )

Control study subjects (n=15)

Lost to follow-up (personal reasons) (n=3)

Obese study subjects (n=27) undergoing bariatric surgery procedure as part of their normal treatment.

Randomized for RYGB and sleeve gastrectomy by gastrosurgeon in outpatient clinic at the Hospital District of Southwest Finland

gastrectomygastrectomy

Analysed (n=13 )
RYGB (n=6) and sleeve gastrectomy (n=7)

inability to PCR amplify the extracted DNA (n=9)

successful microbiota profile only from a single time point (n=2)

inability to PCR amplify the extracted DNA (n=9)
