# Supplementary figures and images for: Partial restoration of normal intestinal microbiota in morbidly obese women six months after bariatric surgery
Source: PeerJ journal article supplement (doi:10.7717/peerj.10442), 2020-11-26

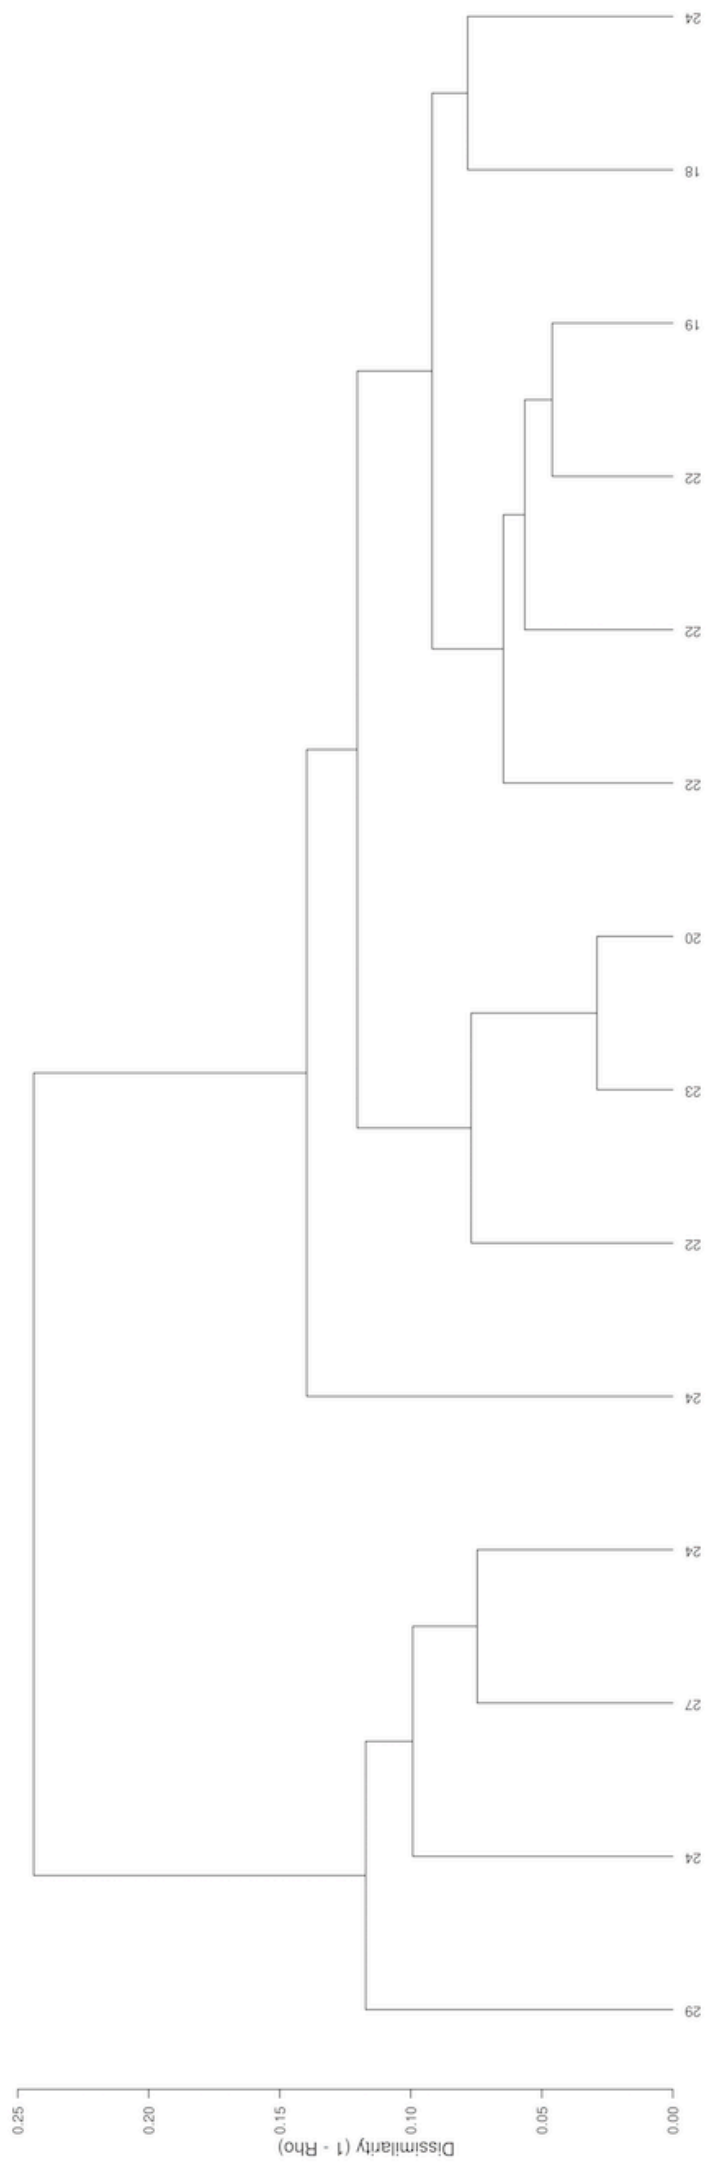

Supplement: SF1.pdf [file SF1.pdf]

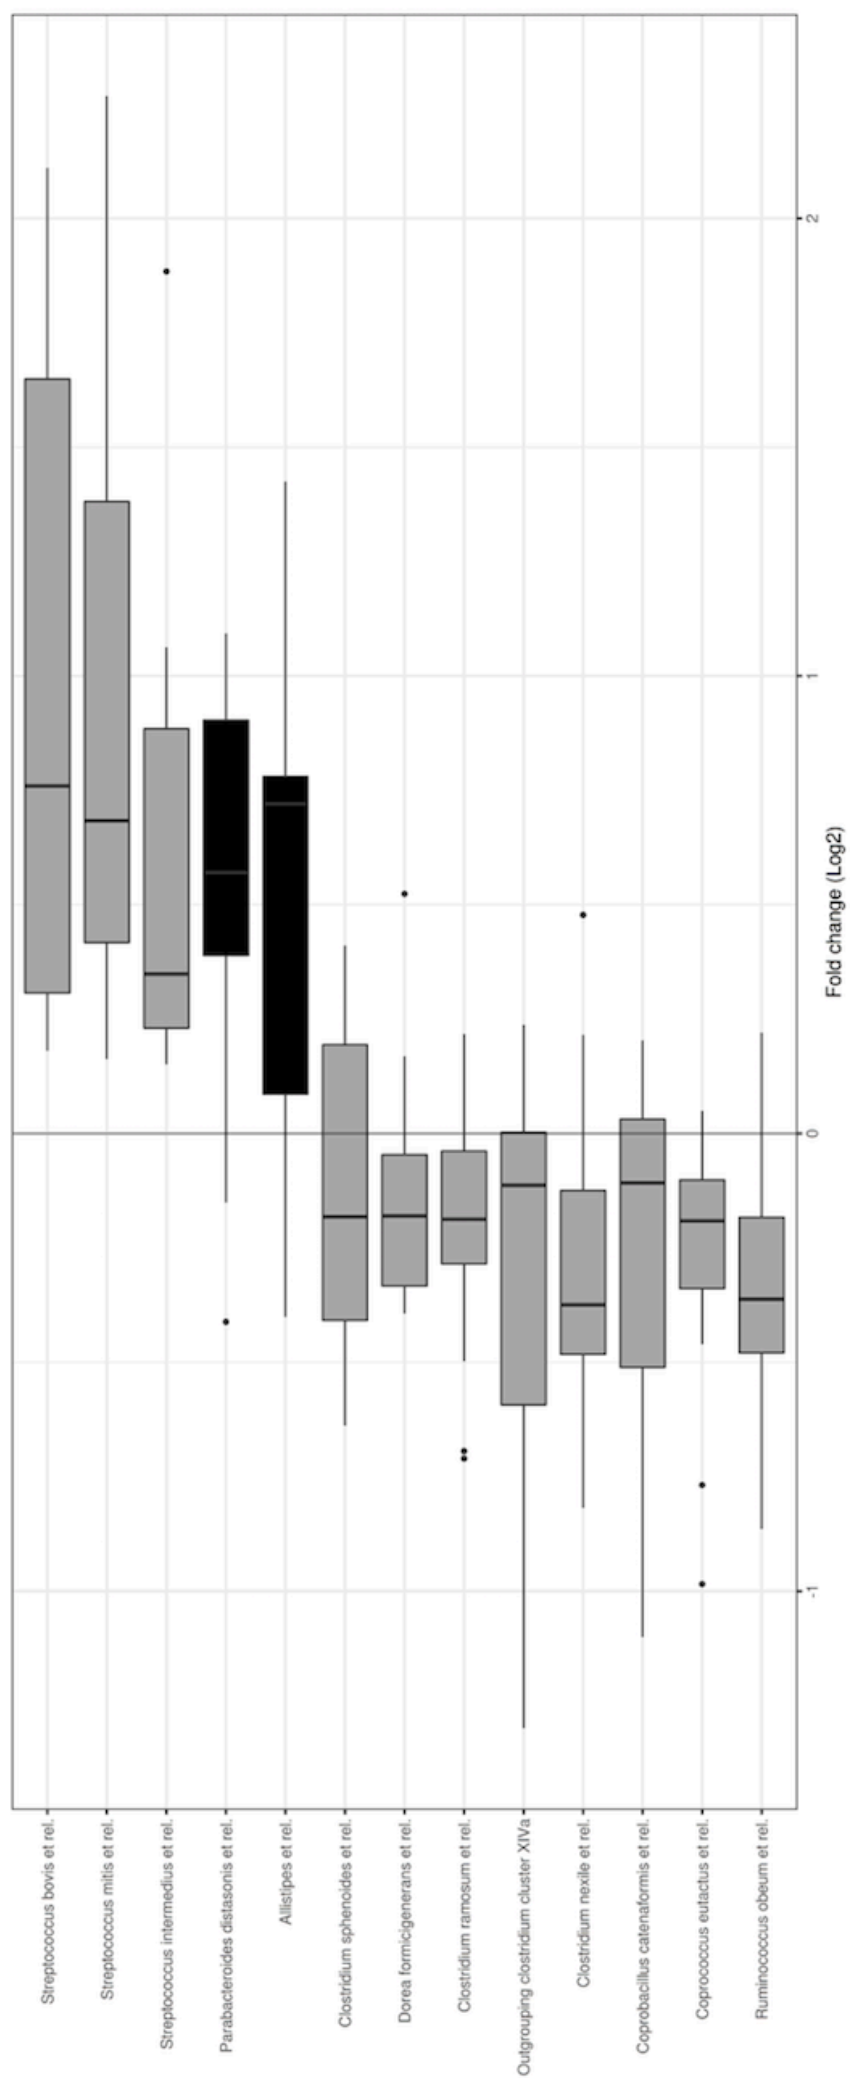

■ Bacteroides  
■ Firmicutes

Supplement: Suppl2Bfig.pdf [file Suppl2Bfig.pdf]
